# Supplementary material
Source: MDPI journal article supplement (https://www.mdpi.com/2311-7524/9/12/1299)
Supplement: s1 [file s1]

## Supplementary

**Supplementary Table S1.** The fish feed composition.

| <b>Composition</b> |               |
|--------------------|---------------|
| Crude protein      | 32%           |
| Crude fat          | 6%            |
| Crude fibre        | 3.9%          |
| Ash                | 6%            |
| Calcium            | 1%            |
| Sodium             | 0.2%          |
| Phosphorus         | 0.8%          |
| <b>Additives</b>   |               |
| E672 Vitamin A     | 5000 U.I/I.E. |
| E671 Vitamin D3    | 750 U.I/I.E.  |
| E1 Iron            | 42 mg         |
| E2 Iodine          | 2.1 mg        |
| E4 Copper          | 5 mg          |
| E5 Manganese       | 16 mg         |
| E6 Zinc            | 100 mg        |
| E321 BHT           | 50 mg         |
